# Supplementary material for: A new organic NLO material isonicotinamidium picrate (ISPA): crystal structure, structural modeling and its physico-chemical properties
Source: Royal Society of Chemistry journal article supplement (doi:10.1039/c6ra10477k), 2016-01-01
Supplement: c6ra10477k1.pdf [file c6ra10477k1.pdf]

## **A new organic NLO material isonicotinamidium picrate (ISPA): Crystal Structure, structural modeling and its physico-chemical properties**

**RO. MU. Jauhar<sup>a</sup>, V. Viswanathan<sup>b</sup>, P. Vivek<sup>c</sup>, G. Vinitha<sup>d</sup>, D. Velmurugan<sup>b</sup>,  
P. Murugakoothan<sup>a\*</sup>**

<sup>a</sup>MRDL, PG and Research Department of Physics, Pachaiyappa's College, Chennai – 600 030.

<sup>b</sup>Centre of Advanced Study in Crystallography and Biophysics, University of Madras, Guindy Campus, Chennai - 600 025.

<sup>c</sup>Sri Venkateswara Institute of Technology, Kolundhalur, Thiruvallur- 602 001.

<sup>d</sup>Division of Physics, School of Advanced Science, VIT University, Chennai - 600 127.

E-mail: [murugakoothan03@yahoo.com](mailto:murugakoothan03@yahoo.com)

Tel: +91 9444447586

### ELECTRONIC SUPPLEMENTARY INFORMATION

#### **Experimental**

##### **Material synthesis and crystal growth**

Mixed solvents were chosen for the synthesis process because their dependence on temperature enhances the growth rate of the crystals. In such cases, the favourable solvent for the material dominates at higher temperatures and the less favourable one dominates at lower temperatures, thus concentrates on the entire temperature range completely.<sup>1</sup>

When the solute was introduced into the solvent light yellow coloured precipitate was formed and it was dissolved using the same solvent. The resultant product is isonicotinamidium picrate. The schematic chemical reaction is shown in **Figure S1**. Isonicotinamide is a strong base which accepts a proton in acidic medium and forms the salt of the respective acid. The reaction is a proton transfer reaction where a proton is transferred from the electron donor group of picric acid to the electron acceptor group of isonicotinamide. The solution was stirred continuously for 8 hours to attain homogeneity. The solution was then filtered using Whatman filter paper and

covered with perforated polythene sheet to restrict abundant evaporation. The filtered solution was allowed to evaporate at room temperature (33°C). After a span of 20 days bushy crystals of the title material were harvested.

Then the bushy like crystals were collected, grounded and was used for the solubility studies of the title material. The solubility study was carried out as a function of temperature ranging from 25°C to 45°C with an interval of 5°C using a constant temperature water bath with temperature accuracy of  $\pm 0.01^\circ\text{C}$  by gravimetric method. Figure S2 shows the solubility curve of ISPA revealing the positive solubility gradient of the titular material in a 2:1 ratio mixed acetonitrile and water solvent. The solubility of ISPA is found to be 2.9 g/100 mL at 45 °C.

Now with respect to the solubility data, solution was prepared at 45°C, filtered using Whatman filter paper and kept in a constant temperature water bath maintained at 45°C. After a span of 20 days, needle shaped crystals with much improved morphology than those of the crystals grown at room temperature were harvested. But in order to get a better morphology the solution was now prepared at 40 °C as like the procedure mentioned above. After a span of 22 days optical quality crystals were harvested. This can be understood from the fact that evaporation rate and viscosity plays a vital role in the growth of crystals. At 40°C the solution may get suitable solubility with enough evaporation rate associated with optimum viscosity of the solution. When solubility increases, viscosity of the solution also increases, which controls the evaporation rate even at little high temperature and finally growth solution becomes stable. This particular crystal grown at 40°C was used for further characterization studies.

Initially ISPA compound was synthesized using various solvents such as water, methanol, ethanol, acetone and acetonitrile. All these solvents were used to dissolve the ISPA compound separately. But the compound is completely insoluble in all the above solvents. Then

it was tried with mixing ethanol and water, methanol and water, acetonitrile and water in a 1:1 ratio. It was synthesized even by changing the mixed solvents ratio. But, only acetonitrile and water solvent could dissolve the ISPA compound partially. Then, acetonitrile and water were mixed in a 2:1 ratio in which the source materials of the titular compound dissolved completely.

### Calculation of polarizability and plasma energy

The valence electron plasma energy  $\hbar\omega_p$  is given by,

$$\hbar\omega_p = 28.8 \sqrt{\left[\frac{Z\rho}{M}\right]}$$

where  $Z$  is the total number of valence electrons,  $\rho$  is the density and  $M$  is the molecular weight of the ISPA crystal. The plasma energy in terms of Penn gap ( $E_p$ ) and Fermi gap ( $E_F$ ) in eV is given as

$$E_p = \frac{\hbar\omega_p}{(\epsilon_\infty - 1)^{1/2}}$$

and

$$E_F = 0.2948 (\hbar\omega_p)^{4/3}$$

The polarizability,  $\alpha$ , from the Penn gap analysis is given by

$$\alpha = \left\{ \frac{(\hbar\omega_p)^2 S_0}{(\hbar\omega_p)^2 S_0 + 3E_p^2} \right\} \frac{M}{\rho} \times 0.396 \times 10^{-23}$$

where  $S_0$  is the constant for a particular material and is given by

$$S_0 = 1 - \left[ \frac{E_p}{4E_F} \right] + \frac{1}{3} \left[ \frac{E_p}{4E_F} \right]^2$$

The value of polarizability  $\alpha$  is also be determined using the Clausius–Mossotti relation, which is given as

$$\alpha = \frac{3M}{4\pi N_A \rho} \left( \frac{\epsilon_\infty - 1}{\epsilon_\infty + 2} \right)$$

### Third order nonlinear optical study

The measurable quantity ( $\Delta T_{p-v}$ ), the difference between the peak and valley transmittances

$T_p - T_v$ , as function of on-axis phase shift  $|\Delta\Phi_0|$  is given by

$$|\Delta\Phi_0| = \frac{\Delta T_{P-V}}{0.406(1-S)^{0.25}}$$

where S is the aperture linear transmittance and  $|\Delta\Phi_0|$  is the on-axis phase shift.

$$S = 1 - \exp\left(\frac{-2r_0^2}{\omega_0^2}\right)$$

The on-axis phase shift is related to the third-order nonlinear refractive index ( $n_2$ ),

$$n_2 = \frac{\Delta\Phi_0\lambda}{2\pi I_0 L_{eff}}$$

where  $L_{eff}$  is the effective thickness of the sample and is given by  $L_{eff} = [1 - \exp(-\alpha L)]/\alpha$ ,  $\alpha$  is the linear absorption coefficient, L is the thickness of the sample and  $I_0$  is the on-axis irradiance at focus. From open-aperture Z-scan data, the nonlinear absorption coefficient  $\beta$  was estimated using the following relation.

$$\beta = \frac{2\sqrt{2\Delta T}}{I_0 L_{eff}}$$

The real and imaginary parts of the third-order NLO susceptibility  $\chi^{(3)}$  were determined from experimental determination of  $n_2$  and  $\beta$  according to the following relations:

$$\text{Re } \chi^{(3)} (\text{esu}) = 10^{-4} \frac{\epsilon_0 C^2 n_0^2 n_2}{\pi} \left( \frac{\text{cm}^2}{W} \right)$$

$$\text{Im } \chi^{(3)} (\text{esu}) = 10^{-2} \frac{\epsilon_0 C^2 n_0^2 n_2 \lambda \beta}{4\pi^2} \left( \frac{\text{cm}}{W} \right)$$

The absolute value of  $\chi^{(3)}$  was calculated from the following relation:

$$|\chi^{(3)}| = \sqrt{[(\text{Re}(\chi^{(3)}))^2 + (\text{Im}(\chi^{(3)}))^2]}$$

## Reference

- 1 R. Surekha, R. Gunaseelan, P. Sagayaraj and K. Ambujam, *CrystEnggComm*, 2014, 16, 7979.

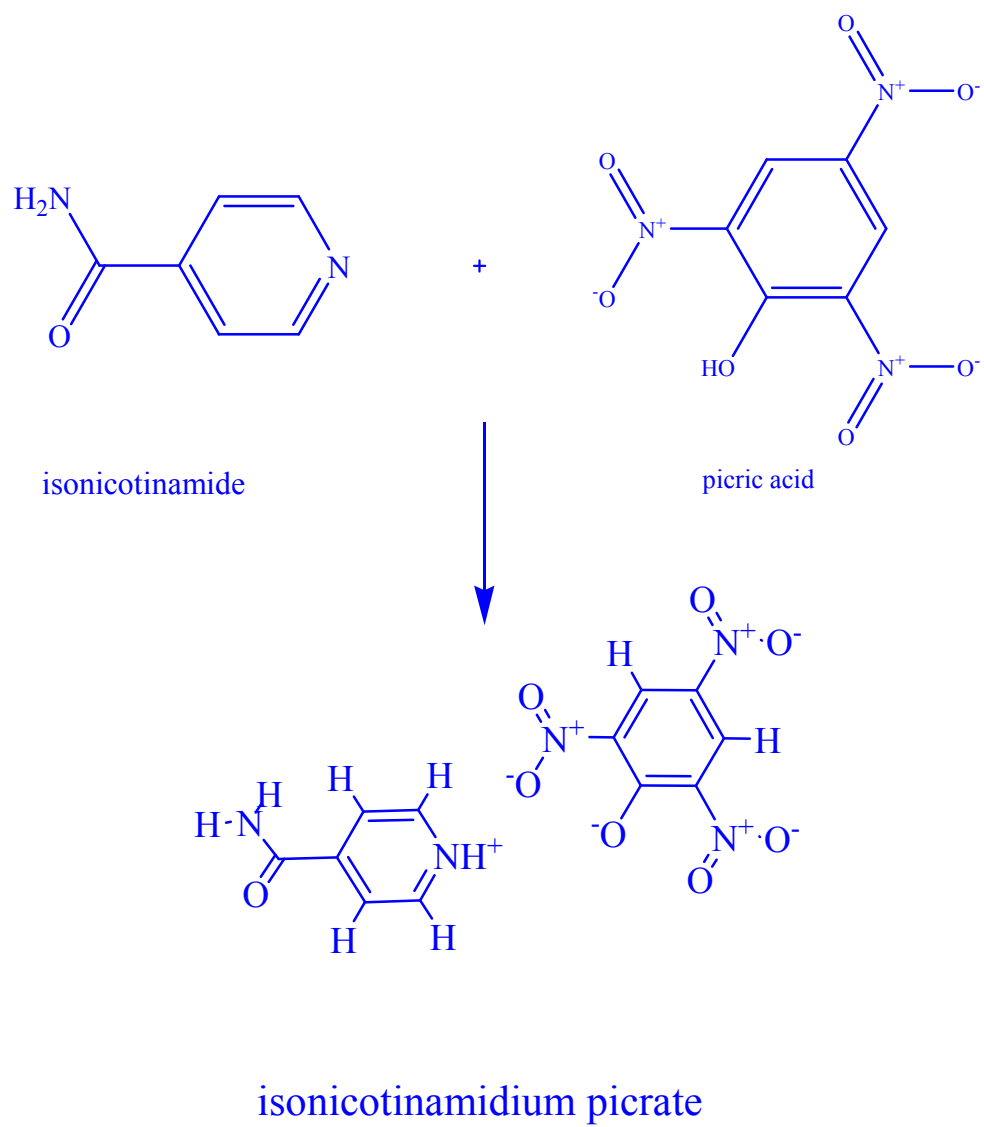

Figure S1 Reaction scheme of ISPA compound

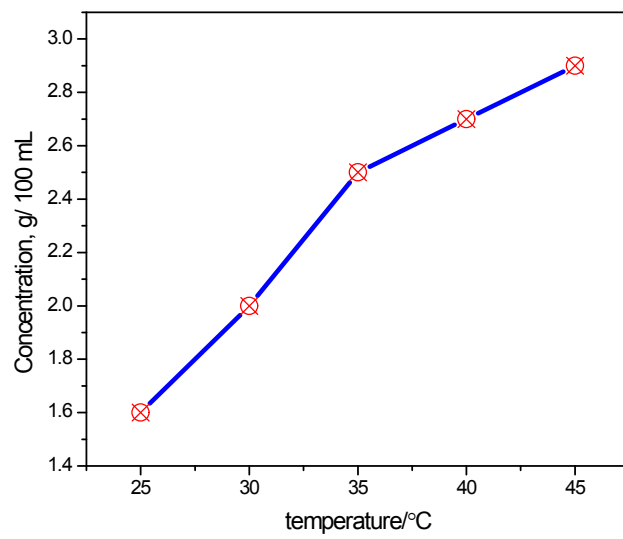

Figure S2 Solubility curve of ISPA

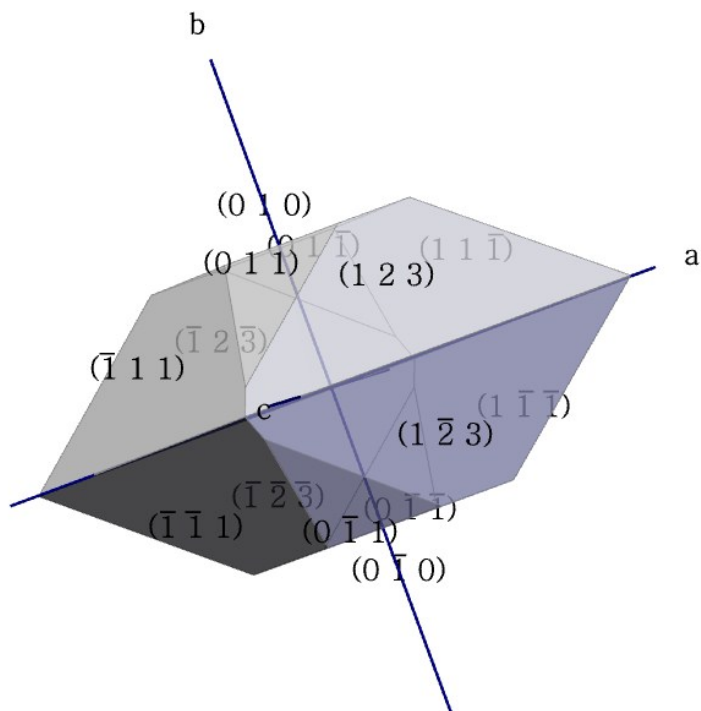

Figure S3 Morphology of ISPA crystal

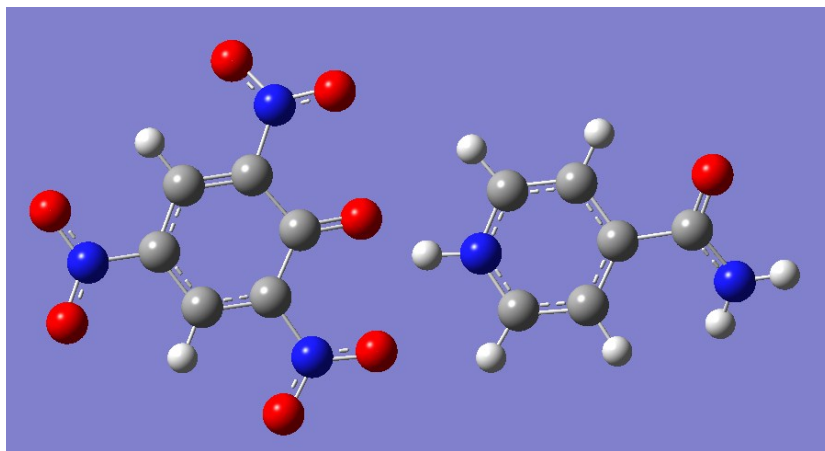

Figure S4 Optimized molecular geometry of ISPA

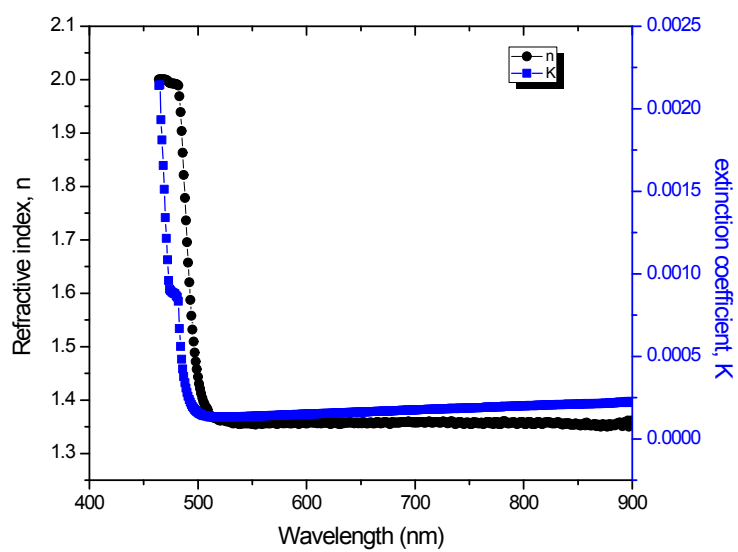

Figure S5 Variation of refractive index and extinction coefficient vs wavelength for ISPA crystal



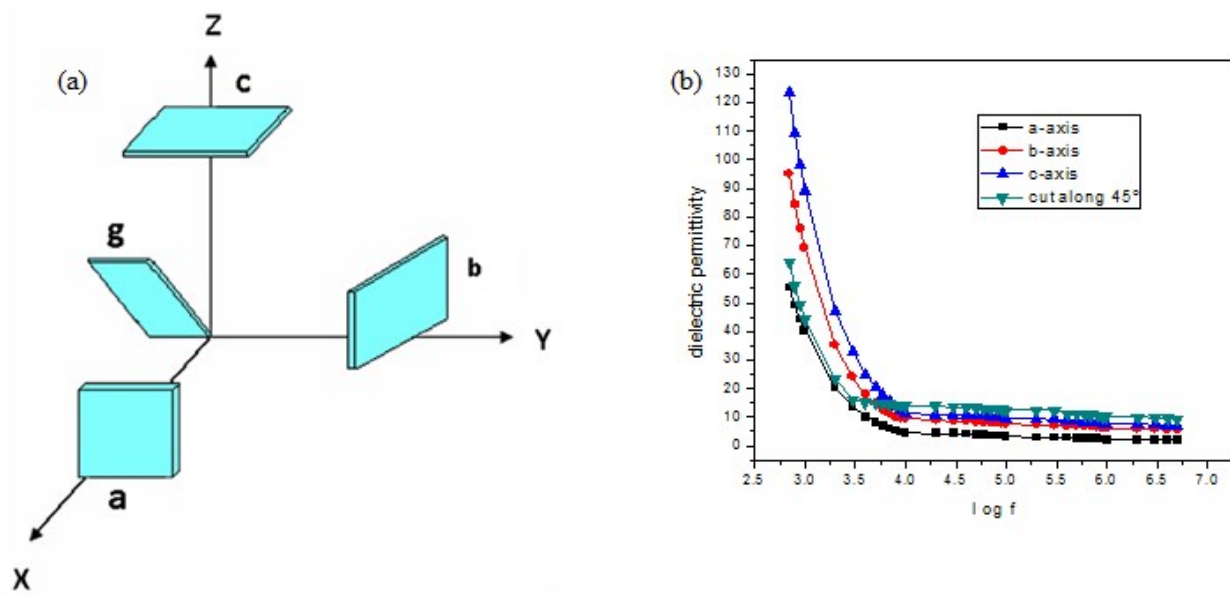

Figure S6 (a) Orientations of the samples for dielectric study  
 (b) Dielectric tensor components for ISPA crystal

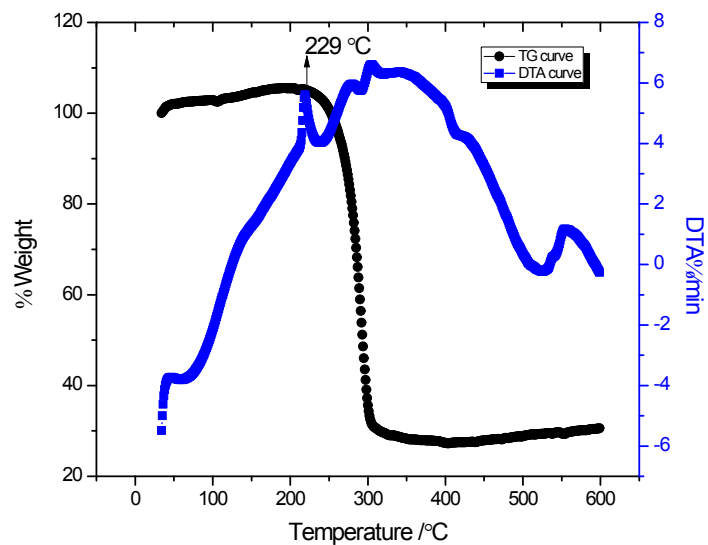

Figure S7 TG-DTA curves of ISPA

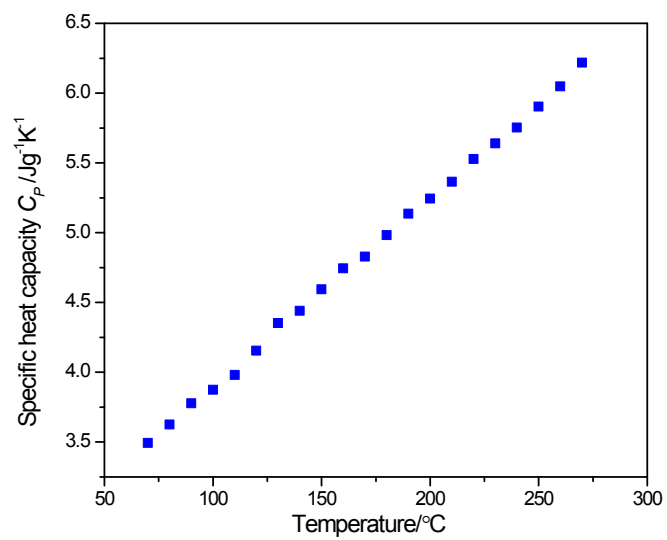

Figure S8 Plot of temperature versus specific heat capacity of ISPA

**Table S1 Crystal data and structure refinement for ISPA**

---

|                                                  |                                                                                                      |
|--------------------------------------------------|------------------------------------------------------------------------------------------------------|
| Identification code                              | ISPA                                                                                                 |
| Empirical formula                                | C <sub>12</sub> H <sub>9</sub> N <sub>5</sub> O <sub>8</sub>                                         |
| Formula weight                                   | 351.24                                                                                               |
| Temperature                                      | 293(2) K                                                                                             |
| Wavelength                                       | 0.71073 Å                                                                                            |
| Crystal system, space group                      | monoclinic, P2 <sub>1</sub> /n                                                                       |
| Unit cell dimensions                             | a = 14.290(5) Å, α = 90.000(5)°<br>b = 7.430(5) Å, β = 116.638(5)°<br>c = 14.697(5) Å γ = 90.000(5)° |
| Volume (Å <sup>3</sup> )                         | 1394.8(12)                                                                                           |
| Z, Calculated density (Mg/m <sup>3</sup> )       | 4, 1.673                                                                                             |
| Absorption coefficient (mm <sup>-1</sup> )       | 0.144                                                                                                |
| F(000)                                           | 720                                                                                                  |
| Crystal size (mm <sup>3</sup> )                  | 0.20 x 0.15 x 0.10                                                                                   |
| Theta range for data collection (deg.)           | 2.68 to 31.47                                                                                        |
| Limiting indices                                 | -20 ≤ h ≤ 20, -10 ≤ k ≤ 10, -21 ≤ l ≤ 18                                                             |
| Reflections collected / unique[R(int) = 0.0354]  | 28313 / 4279                                                                                         |
| Completeness to theta                            | 31.47 92.5 %                                                                                         |
| Absorption correction                            | Semi-empirical from equivalents                                                                      |
| Max. and min. transmission                       | 0.9858 and 0.9718                                                                                    |
| Refinement method                                | Full-matrix least-squares on F <sup>2</sup>                                                          |
| Data / restraints / parameters                   | 4279 / 0 / 226                                                                                       |
| Goodness-of-fit on F <sup>2</sup>                | 1.118                                                                                                |
| Final R indices [I > 2σ(I)]                      | R1 = 0.0643, wR2 = 0.1482                                                                            |
| R indices (all data)                             | R1 = 0.1095, wR2 = 0.1711                                                                            |
| Largest diff. peak and hole (e Å <sup>-3</sup> ) | 0.284 and -0.325                                                                                     |

---

**Table S2 Selected Bond lengths**

| <b>Bond length</b> | <b>Experimental (Å)</b> | <b>Theoretical (Å)</b> |
|--------------------|-------------------------|------------------------|
| O(8)-C(7)          | 1.244(3)                | 1.278                  |
| N(5)-O(2)          | 1.208(3)                | 1.277                  |
| N(5)-O(3)          | 1.229(3)                | 1.267                  |
| N(5)-C(12)         | 1.456(3)                | 1.443                  |
| O(1)-C(6)          | 1.217(3)                | 1.248                  |
| N(2)-C(6)          | 1.322(3)                | 1.363                  |
| C(3)-C(6)          | 1.512(3)                | 1.507                  |
| N(1)-C(1)          | 1.333(3)                | 1.354                  |
| N(1)-C(5)          | 1.335(3)                | 1.349                  |
| N(4)-O(4)          | 1.215(3)                | 1.267                  |
| N(4)-O(5)          | 1.225(3)                | 1.267                  |
| N(4)-C(10)         | 1.444(3)                | 1.449                  |
| N(3)-O(7)          | 1.211(3)                | 1.264                  |
| N(3)-O(6)          | 1.220(3)                | 1.269                  |
| N(3)-C(8)          | 1.447(3)                | 1.458                  |
| O(2)-N(5)-O(3)     | 122.8(2)                | 121.6                  |
| O(2)-N(5)-C(12)    | 120.1(2)                | 119.5                  |
| O(3)-N(5)-C(12)    | 117.1(2)                | 118.7                  |
| C(1)-N(1)-C(5)     | 122.6(2)                | 122.8                  |
| C(11)-C(12)-N(5)   | 116.51(19)              | 116.5                  |
| C(7)-C(12)-N(5)    | 118.47(18)              | 120.8                  |

|                  |            |       |
|------------------|------------|-------|
| O(8)-C(7)-C(8)   | 125.3(2)   | 124.5 |
| O(8)-C(7)-C(12)  | 123.20(19) | 121.4 |
| O(4)-N(4)-O(5)   | 122.4(2)   | 123.8 |
| O(4)-N(4)-C(10)  | 118.97(19) | 118.1 |
| O(5)-N(4)-C(10)  | 118.64(19) | 117.9 |
| O(1)-C(6)-N(2)   | 123.6(2)   | 122.7 |
| O(1)-C(6)-C(3)   | 118.9(2)   | 120.0 |
| N(2)-C(6)-C(3)   | 117.5(2)   | 117.2 |
| O(7)-N(3)-O(6)   | 122.0(2)   | 123.2 |
| O(7)-N(3)-C(8)   | 120.0(2)   | 119.3 |
| O(6)-N(3)-C(8)   | 117.9(2)   | 117.2 |
| C(9)-C(10)-N(4)  | 118.87(19) | 119.3 |
| C(11)-C(10)-N(4) | 119.58(19) | 119.4 |
| C(9)-C(8)-N(3)   | 116.04(19) | 116.8 |
| N(3)-C(8)-C(7)   | 119.60(19) | 119.9 |
| N(1)-C(1)-C(2)   | 119.8(2)   | 119.6 |
| N(1)-C(5)-C(4)   | 119.4(2)   | 119.5 |

---

**Table S3 Selected Torsion angles**

| <b>Bond</b>            | <b>Bond angle (°)</b> |
|------------------------|-----------------------|
| O(2)-N(5)-C(12)-C(11)  | 146.3(2)              |
| O(3)-N(5)-C(12)-C(7)   | 144.7(2)              |
| N(5)-C(12)-C(11)-C(10) | 179.1(2)              |
| C(11)-C(12)-C(7)-O(8)  | 179.5(2)              |
| N(5)-C(12)-C(7)-C(8)   | -176.70(19)           |
| C(2)-C(3)-C(6)-O(1)    | -163.2(2)             |
| C(4)-C(3)-C(6)-N(2)    | -168.6(2)             |
| C(12)-C(11)-C(10)-N(4) | 179.2(2)              |
| O(4)-N(4)-C(10)-C(9)   | 179.3(2)              |
| O(5)-N(4)-C(10)-C(11)  | 176.7(2)              |
| O(7)-N(3)-C(8)-C(9)    | -159.0(2)             |
| O(6)-N(3)-C(8)-C(7)    | -155.6(3)             |
| O(8)-C(7)-C(8)-C(9)    | -179.8(2)             |
| C(12)-C(7)-C(8)-N(3)   | 175.5(2)              |
| N(3)-C(8)-C(9)-C(10)   | -177.5(2)             |
| N(4)-C(10)-C(9)-C(8)   | -179.6(2)             |

**Table S4 Hydrogen Bonds**

| <b>D—H...A</b>          | <b>D—H(Å)</b> | <b>H...A(Å)</b> | <b>D...A(Å)</b> | <b>D—H...A[°]</b> |
|-------------------------|---------------|-----------------|-----------------|-------------------|
| N(1)-H(1A)...O(7) [i]   | 0.86          | 2.18            | 2.8457(19)      | 134               |
| N(1)-H(1A)...O(8) [i]   | 0.86          | 1.91            | 2.6551(18)      | 144               |
| N(2)-H(2A)...O(4) [ii]  | 0.86          | 2.51            | 3.239(2)        | 143               |
| N(2)-H(2A)...O(5) [ii]  | 0.86          | 2.39            | 3.222(2)        | 164               |
| N(2)-H(2B)...O(3) [iii] | 0.86          | 2.21            | 3.026(2)        | 159               |
| C(1)-H(1)...O(6) [iv]   | 0.93          | 2.34            | 3.048(2)        | 133               |
| C(5)-H(5)...O(7) [i]    | 0.93          | 2.56            | 3.037(2)        | 112               |
| C(5)-H(5)...O(5) [v]    | 0.93          | 2.59            | 3.410(2)        | 148               |
| C(11)-H(11)...O(1) [vi] | 0.93          | 2.42            | 3.304(2)        | 159               |

Symmetry codes: i)  $-x, -y, 1-z$ ; ii)  $-x, 1-y, -z$ ; iii)  $-1/2+x, 1/2-y, -1/2+z$ ; iv)  $-1/2-x, -1/2+y, 1/2-z$ ; v)  $1/2+x, 1/2-y, 1/2+z$ ; vi)  $1/2-x, 1/2+y, 1/2-z$ .

**Table S5 Parameters for Polarizability**

| Parameter                                        | Values                     |
|--------------------------------------------------|----------------------------|
| Plasma Energy (eV)                               | 22.664                     |
| Penn gap (eV)                                    | 7.554                      |
| Fermi gap (eV)                                   | 18.710                     |
| Polarizability (cm <sup>-3</sup> ) Penn analysis | 6.0583 x 10 <sup>-23</sup> |
| Claussius Mossotti (cm <sup>-3</sup> ) equation  | 6.24 x 10 <sup>-23</sup>   |
